# Supplementary material for: Work-related stress and well-being in association with epigenetic age acceleration: A Northern Finland Birth Cohort 1966 Study
Source: publisher site journal article supplement (doi:10.18632/aging.203872), 2022-02-02
Supplement: Supplementary file [file aging-v14i3-203872-supplementary-material-SD2.pdf]

## SUPPLEMENTARY FIGURE

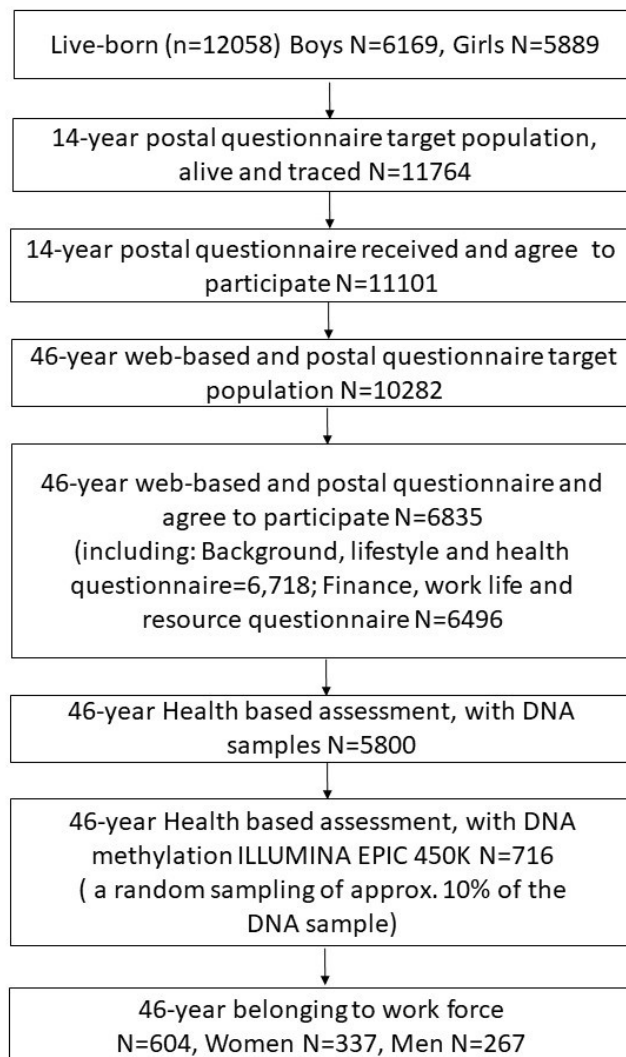

Supplementary Figure 1. Flowchart of the study population in the NFBC 1966.
