# Supplementary material for: Work-related stress and well-being in association with epigenetic age acceleration: A Northern Finland Birth Cohort 1966 Study
Source: publisher site journal article supplement (doi:10.18632/aging.203872), 2022-02-02
Supplement: Supplementary file [file aging-v14i3-203872-supplementary-material-SD3.pdf]

## SUPPLEMENTARY TABLES

**Supplementary Table 1. P-values for analysis of variance (ANOVA) and chi-square test, for all job exposures and risk factors.**

| <b>ANOVA<br/>P-values</b>      | <b>Sex*</b> | <b>BMI</b> | <b>Education</b> | <b>Physical activity</b> | <b>Alcohol consumption</b> | <b>Smoking</b> |
|--------------------------------|-------------|------------|------------------|--------------------------|----------------------------|----------------|
| Control                        | 0.04        | 0.18       | <0.001           | 0.34                     | 0.82                       | 0.65           |
| Demand                         | <0.001      | 0.31       | <0.001           | 0.24                     | 0.12                       | 0.38           |
| Job strain                     | <0.001      | 0.45       | <0.001           | 0.57                     | 0.32                       | 0.45           |
| Job strain linear              | <0.001      | 0.33       | <0.001           | 0.37                     | 0.23                       | 0.5            |
| Job strain quotient            | <0.001      | 0.45       | <0.001           | 0.57                     | 0.32                       | 0.45           |
| Effort                         | 0.01        | 0.62       | <0.001           | 0.47                     | 0.61                       | <0.001         |
| Reward                         | 0.29        | 0.56       | 0.03             | 0.91                     | <0.001                     | 0.22           |
| Effort-Reward Imbalance        | 0.03        | 0.9        | 0.2              | 0.58                     | 0.24                       | 0.02           |
| Overcommitment                 | 0.02        | 0.35       | 0.05             | 0.08                     | 0.91                       | 0.09           |
| Work attitude                  | <0.001      | 0.54       | <0.001           | 0.1                      | 0.2                        | 0.24           |
| Work engagement                | <0.001      | 0.49       | <0.001           | 0.06                     | 0.05                       | 0.1            |
| <b>Chi Square<br/>P-values</b> |             |            |                  |                          |                            |                |
| Job status                     | <0.001      | 0.61       | 0.27             | 0.86                     | 0.71                       | 0.23           |
| Employer                       | <0.001      | 0.17       | <0.001           | 0.57                     | 0.03                       | <0.001         |
| Occupational group             | 0.98        | 0.81       | <0.001           | 0.86                     | 0.3                        | <0.001         |
| Job Strain quartile            | <0.001      | 0.3        | <0.001           | 0.89                     | 0.28                       | 0.75           |
| Job Strain Revised             | <0.001      | 0.05       | <0.001           | 0.16                     | 0.07                       | 0.71           |
| Work history                   | 0.26        | 0.38       | 0.05             | 0.86                     | 0.76                       | 0.2            |
| OPA                            | 0.21        | 0.05       | <0.001           | 0.71                     | 0.55                       | 0.06           |
| Working hours                  | <0.001      | 0.87       | 0.04             | 0.12                     | <0.001                     | 0.36           |
| Shift                          | 0.53        | 0.14       | <0.001           | 0.66                     | 0.05                       | 0.03           |
| Job Security                   | 0.84        | 0.7        | 0.91             | 0.95                     | 0.19                       | 0.13           |

\*For sex is a t-test as it has only two levels.

**Supplementary Table 2. Pearson correlations among extrinsic epigenetic age acceleration and pace of ageing.**

| <b>N=604</b> | <b>Horvath</b> | <b>Hannum</b> | <b>PhenoAge</b> | <b>GrimAge</b> |
|--------------|----------------|---------------|-----------------|----------------|
| Horvath      |                |               |                 |                |
| Hannum       | 0.96           |               |                 |                |
| PhenoAge     | 0.48           | 0.47          |                 |                |
| GrimAge      | 0.23           | 0.20          | 0.31            |                |
| DunedinPoAm  | 0.24           | 0.20          | 0.33            | 0.78           |

**Supplementary Table 3. Adjusted coefficient estimates from linear regression with 95% confidence intervals.**

|                                              |                               | <b>HorvathAA</b>              | <b>HannumAA</b>               | <b>PhenoAgeAA</b>             | <b>GrimAgeAA</b>               | <b>DunedinPoAm</b>            |
|----------------------------------------------|-------------------------------|-------------------------------|-------------------------------|-------------------------------|--------------------------------|-------------------------------|
|                                              |                               | <b>Estimates<br/>(95% CI)</b> | <b>Estimates<br/>(95% CI)</b> | <b>Estimates<br/>(95% CI)</b> | <b>Estimates<br/>(95% CI)</b>  | <b>Estimates<br/>(95% CI)</b> |
| Job Status                                   | permanent                     | Ref.                          | Ref.                          | Ref.                          | Ref.                           | Ref.                          |
|                                              | temporary                     | -1.127<br>(-2.422,0.168)      | -0.694<br>(-1.661,0.272)      | -0.505<br>(-2.017,1.008)      | 0.631<br>(-0.341,1.602)        | 0.005<br>(-0.013,0.023)       |
|                                              | unemployed                    | 0.063<br>(-1.325,1.451)       | -0.006<br>(-1.042,1.03)       | 0.817<br>(-0.804,2.438)       | 0.602<br>(-0.439,1.644)        | 0.004<br>(-0.015,0.023)       |
| Employer                                     | private employer              | Ref.                          | Ref.                          | Ref.                          | Ref.                           | Ref.                          |
|                                              | state/municipality            | 0.063<br>(-0.699,0.825)       | 0.048<br>(-0.522,0.618)       | 0.116<br>(-0.775,1.008)       | -0.096<br>(-0.655,0.463)       | 0<br>(-0.011,0.01)            |
| Occupational group                           | Blue collars                  | Ref.                          | Ref.                          | Ref.                          | Ref.                           | Ref.                          |
|                                              | White collars                 | 0.509<br>(-0.274,1.292)       | 0.318<br>(-0.268,0.905)       | 0.257<br>(-0.653,1.166)       | -0.683<br>(-1.264,-0.102)<br>* | -0.002<br>(-0.013,0.008)      |
| Job control                                  |                               | 0.317<br>(-0.149,0.782)       | 0.169<br>(-0.179,0.517)       | -0.186<br>(-0.73,0.359)       | -0.154<br>(-0.508,0.199)       | -0.001<br>(-0.007,0.006)      |
| Job demand                                   |                               | 0.086<br>(-0.446,0.618)       | 0.118<br>(-0.279,0.514)       | -0.483<br>(-1.103,0.137)      | -0.018<br>(-0.42,0.384)        | -0.004<br>(-0.012,0.003)      |
| Job strain Linear                            |                               | -0.41<br>(-1.234,0.415)       | -0.154<br>(-0.769,0.462)      | -0.354<br>(-1.314,0.605)      | 0.157<br>(-0.465,0.779)        | -0.005<br>(-0.017,0.006)      |
| Job strain                                   | Low strain                    | Ref.                          | Ref.                          | Ref.                          | Ref.                           | Ref.                          |
|                                              | active work                   | 0.217<br>(-0.724,1.158)       | 0.271<br>(-0.431,0.973)       | -1.301<br>(-2.391,-0.212) *   | 0.254<br>(-0.454,0.963)        | -0.005<br>(-0.018,0.009)      |
|                                              | passive work                  | 0.177<br>(-0.856,1.21)        | 0.223<br>(-0.547,0.994)       | -0.666<br>(-1.862,0.53)       | 0.518<br>(-0.26,1.296)         | 0.005<br>(-0.01,0.019)        |
|                                              | high strain                   | -0.189<br>(-1.256,0.877)      | -0.037<br>(-0.832,0.759)      | -0.527<br>(-1.761,0.708)      | 0.526<br>(-0.277,1.329)        | 0 (-<br>0.015,0.015)          |
| Job strain quotient                          |                               | -0.843<br>(-2.066,0.379)      | -0.414<br>(-1.328,0.499)      | -0.568<br>(-1.992,0.855)      | 0.234<br>(-0.69,1.157)         | -0.009<br>(-0.026,0.008)      |
| Job strain tertile                           | Low strain                    | Ref.                          | Ref.                          | Ref.                          | Ref.                           | Ref.                          |
|                                              | Intermediate strain           | -0.328<br>(-1.194,0.538)      | -0.101<br>(-0.748,0.545)      | -0.942<br>(-1.946,0.062)      | 0.31<br>(-0.343,0.963)         | 0.001<br>(-0.012,0.013)       |
|                                              | high strain                   | -0.226<br>(-1.109,0.657)      | -0.032<br>(-0.691,0.627)      | -0.283<br>(-1.307,0.741)      | 0.133<br>(-0.532,0.799)        | -0.002<br>(-0.014,0.011)      |
| Effort                                       |                               | -0.582<br>(-1.098,-0.066) *   | -0.44<br>(-0.825,-0.054) *    | -0.323<br>(-0.932,0.285)      | 0.013<br>(-0.381,0.408)        | 0.001<br>(-0.006,0.008)       |
| Reward                                       |                               | 0.115<br>(-0.53,0.76)         | 0.212<br>(-0.27,0.693)        | 0.049<br>(-0.705,0.803)       | 0.095<br>(-0.391,0.58)         | -0.005<br>(-0.014,0.004)      |
| Effort-Reward Imbalance                      |                               | -0.734<br>(-1.598,0.13)       | -0.61<br>(-1.255,0.036)       | -0.38<br>(-1.394,0.634)       | 0.021<br>(-0.632,0.673)        | 0.004<br>(-0.008,0.016)       |
| Overcommitment                               |                               | 0.097<br>(-0.448,0.641)       | 0.065<br>(-0.343,0.472)       | 0.24<br>(-0.396,0.876)        | -0.029<br>(-0.443,0.386)       | 0<br>(-0.008,0.008)           |
| Work history                                 | At least temporary unemployed | Ref.                          | Ref.                          | Ref.                          | Ref.                           | Ref.                          |
|                                              | Continuously Employed         | 0.205<br>(-0.46,0.87)         | 0.232<br>(-0.263,0.728)       | -0.064<br>(-0.838,0.709)      | -0.406<br>(-0.905,0.092)       | -0.005<br>(-0.014,0.005)      |
| Occupational Physical Activity strenuousness | Low Intensity                 | Ref.                          | Ref.                          | Ref.                          | Ref.                           | Ref.                          |
|                                              | Intermediate Intensity        | -0.357<br>(-1.42,0.705)       | -0.176<br>(-0.971,0.618)      | 0.472<br>(-0.775,1.719)       | 0.638<br>(-0.169,1.445)        | 0.002<br>(-0.013,0.017)       |
|                                              | High Intensity                | -0.345<br>(-1.406,0.715)      | -0.087<br>(-0.88,0.705)       | 0.623<br>(-0.621,1.867)       | 0.017<br>(-0.787,0.822)        | -0.013<br>(-0.028,0.002)      |
| Working hours per week                       | less than 31 hours            | Ref.                          | Ref.                          | Ref.                          | Ref.                           | Ref.                          |

|                 |                    |                           |                          |                          |                          |                          |
|-----------------|--------------------|---------------------------|--------------------------|--------------------------|--------------------------|--------------------------|
|                 | 31-40 hours        | 1.511<br>(-0.001,3.022) * | 1.171<br>(0.042,2.3) *   | -0.446<br>(-2.227,1.336) | -0.629<br>(-1.783,0.526) | -0.006<br>(-0.028,0.015) |
|                 | more than 40 hours | 2.009<br>(0.368,3.651) *  | 1.547<br>(0.321,2.772) * | 0.197<br>(-1.737,2.132)  | -0.657<br>(-1.911,0.597) | -0.005<br>(-0.028,0.018) |
|                 | Day job            | Ref.                      | Ref.                     | Ref.                     | Ref.                     | Ref.                     |
| Working shift   | Evening/shift      | 0.346<br>(-0.54,1.232)    | 0.342<br>(-0.322,1.005)  | 0.481<br>(-0.562,1.524)  | 0.176<br>(-0.5,0.852)    | 0.007<br>(-0.005,0.02)   |
| Work attitude   |                    | 0.025<br>(-0.073,0.123)   | 0.01<br>(-0.063,0.083)   | -0.006<br>(-0.12,0.109)  | 0.04<br>(-0.033,0.112)   | 0<br>(-0.002,0.001)      |
| Work engagement |                    | 0.012<br>(-0.022,0.046)   | 0.008<br>(-0.018,0.034)  | 0.01<br>(-0.03,0.05)     | -0.01<br>(-0.036,0.016)  | 0<br>(-0.001,0)          |
| Job security    | No                 | Ref.                      | Ref.                     | Ref.                     | Ref.                     | Ref.                     |
|                 | Yes                | 1.115<br>(0.16,2.071) *   | 0.841<br>(0.127,1.555) * | 1.015<br>(-0.109,2.138)  | -0.01<br>(-0.74,0.72)    | -0.004<br>(-0.018,0.009) |

Fully adjusted models for: BMI, alcohol consumption, educational level, leisure-time physical activity and smoking.

\*Relevant confidence intervals.

**Supplementary Table 4. Standardized unadjusted coefficient estimates from linear regression with 95% confidence intervals.**

|                     |                     | HorvathAA                 | HannumAA                 | PhenoAgeAA                | GrimAgeAA                  | DunedinPoAm                |
|---------------------|---------------------|---------------------------|--------------------------|---------------------------|----------------------------|----------------------------|
|                     |                     | Estimates (95% CI)        | Estimates (95% CI)       | Estimates (95% CI)        | Estimates (95% CI)         | Estimates (95% CI)         |
| Job Status          | permanent           | Ref.                      | Ref.                     | Ref.                      | Ref.                       | Ref.                       |
|                     | temporary           | -0.319<br>(-0.63,-0.008)* | -0.275<br>(-0.586,0.036) | 0.027<br>(-0.284,0.339)   | 0.149<br>(-0.162,0.459)    | 0.202<br>(-0.109,0.513)    |
|                     | unemployed          | 0.053<br>(-0.29,0.395)    | 0.035<br>(-0.308,0.378)  | 0.186<br>(-0.157,0.529)   | 0.427 (0.085,0.768)*       | 0.27<br>(-0.072,0.613)     |
| Employer            | private employer    | Ref.                      | Ref.                     | Ref.                      | Ref.                       | Ref.                       |
|                     | state/municipality  | -0.085<br>(-0.253,0.083)  | -0.085<br>(-0.253,0.083) | 0.039<br>(-0.129,0.207)   | -0.299<br>(-0.462,-0.135)  | -0.079<br>(-0.245,0.086)   |
| Occupational group  | Blue collars        | Ref.                      | Ref.                     | Ref.                      | Ref.                       | Ref.                       |
|                     | White collars       | 0.034<br>(-0.137,0.205)   | 0.03<br>(-0.142,0.201)   | 0.001<br>(-0.17,0.172)    | -0.355<br>(-0.521,-0.188)* | -0.208<br>(-0.374,-0.042)* |
| Job control         |                     | 0.082<br>(-0.027,0.191)   | 0.066<br>(-0.043,0.176)  | -0.047<br>(-0.156,0.062)  | -0.055<br>(-0.163,0.052)   | -0.062<br>(-0.171,0.046)   |
| Job demand          |                     | 0.006<br>(-0.119,0.13)    | 0.016<br>(-0.109,0.141)  | -0.064<br>(-0.189,0.061)  | -0.087<br>(-0.21,0.036)    | -0.066<br>(-0.189,0.058)   |
| Job strain Linear   |                     | -0.122<br>(-0.314,0.07)   | -0.09<br>(-0.282,0.102)  | -0.02<br>(-0.211,0.171)   | -0.037<br>(-0.226,0.151)   | -0.006<br>(-0.195,0.184)   |
| Job strain          | Low strain          | Ref.                      | Ref.                     | Ref.                      | Ref.                       | Ref.                       |
|                     | active work         | 0.038<br>(-0.191,0.267)   | 0.057<br>(-0.173,0.286)  | -0.25 (-0.477,-0.023)*    | -0.084<br>(-0.308,0.14)    | -0.116<br>(-0.342,0.109)   |
|                     | passive work        | 0.028<br>(-0.221,0.277)   | 0.046<br>(-0.203,0.296)  | -0.143<br>(-0.39,0.104)   | 0.052<br>(-0.192,0.295)    | 0.054<br>(-0.191,0.299)    |
| Job strain quotient | high strain         | -0.089<br>(-0.337,0.16)   | -0.075<br>(-0.324,0.174) | -0.055 (-0.301,0.192)     | 0.004<br>(-0.24,0.248)     | 0.071<br>(-0.173,0.316)    |
|                     |                     | -0.234<br>(-0.521,0.053)  | -0.186<br>(-0.474,0.101) | -0.048<br>(-0.334,0.238)  | 0.014<br>(-0.267,0.296)    | 0.011<br>(-0.272,0.294)    |
| Job strain tertile  | Low strain          | Ref.                      | Ref.                     | Ref.                      | Ref.                       | Ref.                       |
|                     | Intermediate strain | -0.12<br>(-0.328,0.088)   | -0.079<br>(-0.287,0.129) | -0.214<br>(-0.42,-0.007)* | 0.01<br>(-0.194,0.214)     | -0.002 (-0.207,0.203)      |
|                     | high strain         | -0.11<br>(-0.318,0.097)   | -0.085<br>(-0.292,0.123) | -0.04<br>(-0.246,0.166)   | -0.108<br>(-0.311,0.095)   | -0.009<br>(-0.214,0.196)   |
| Effort              |                     | -0.103<br>(-0.227,0.021)  | -0.104<br>(-0.228,0.02)  | -0.051<br>(-0.176,0.074)  | 0.186<br>(0.063,0.308)*    | 0.136<br>(0.012,0.26)*     |
| Reward              |                     | 0.022                     | 0.059                    | 0.049                     | 0.08                       | 0.03 (-0.122,0.183)        |

|                                              |                               |                          |                          |                          |                            |                            |
|----------------------------------------------|-------------------------------|--------------------------|--------------------------|--------------------------|----------------------------|----------------------------|
|                                              |                               | (-0.132,0.176)           | (-0.095,0.214)           | (-0.105,0.204)           | (-0.071,0.232)             |                            |
| Effort-Reward Imbalance                      |                               | -0.131<br>(-0.341,0.079) | -0.151<br>(-0.361,0.059) | -0.082<br>(-0.294,0.129) | 0.195<br>(-0.012,0.401)    | 0.159<br>(-0.049,0.367)    |
| Overcommitment                               |                               | 0.043<br>(-0.088,0.173)  | 0.034<br>(-0.097,0.165)  | 0.027<br>(-0.104,0.158)  | 0.036<br>(-0.094,0.166)    | 0<br>(-0.132,0.131)        |
| Work history                                 | At least temporary unemployed | Ref.                     | Ref.                     | Ref.                     | Ref.                       | Ref.                       |
|                                              | Continuously Employed         | 0.059<br>(-0.102,0.22)   | 0.08<br>(-0.081,0.241)   | -0.023<br>(-0.184,0.138) | -0.163<br>(-0.324,-0.002)* | -0.141<br>(-0.302,0.02)    |
| Occupational Physical Activity strenuousness | Low Intensity                 | Ref.                     | Ref.                     | Ref.                     | Ref.                       | Ref.                       |
|                                              | Intermediate Intensity        | -0.07<br>(-0.325,0.185)  | -0.05<br>(-0.305,0.206)  | 0.093 (-0.164,0.35)      | 0.335 (0.084,0.587)*       | 0.183<br>(-0.072,0.439)    |
|                                              | High Intensity                | 0.016<br>(-0.235,0.268)  | 0.053<br>(-0.199,0.305)  | 0.157 (-0.097,0.41)      | 0.166<br>(-0.082,0.415)    | -0.048<br>(-0.3,0.204)     |
| Working hours per week                       | less than 31 hours            | Ref.                     | Ref.                     | Ref.                     | Ref.                       | Ref.                       |
|                                              | 31-40 hours                   | 0.311<br>(-0.045,0.667)  | 0.321<br>(-0.036,0.677)  | -0.108<br>(-0.469,0.253) | 0.011<br>(-0.345,0.366)    | -0.022<br>(-0.382,0.337)   |
|                                              | more than 40 hours            | 0.513<br>(0.129,0.898)*  | 0.524 (0.139,0.909)*     | 0.018<br>(-0.372,0.407)  | 0.14<br>(-0.243,0.524)     | 0.011<br>(-0.376,0.399)    |
| Working shift                                | Day job                       | Ref.                     | Ref.                     | Ref.                     | Ref.                       | Ref.                       |
|                                              | Evening/shift                 | 0.113<br>(-0.095,0.322)  | 0.131<br>(-0.079,0.341)  | 0.122<br>(-0.089,0.333)  | 0.18<br>(-0.028,0.387)     | 0.217<br>(0.008,0.426)*    |
| Work attitude                                |                               | -0.001<br>(-0.024,0.022) | -0.003<br>(-0.026,0.02)  | -0.001<br>(-0.024,0.022) | -0.01<br>(-0.033,0.013)    | -0.013<br>(-0.036,0.009)   |
| Work engagement                              |                               | 0.001<br>(-0.007,0.009)  | 0.001<br>(-0.007,0.009)  | 0.002<br>(-0.006,0.01)   | -0.012<br>(-0.02,-0.004)*  | -0.009<br>(-0.017,-0.001)* |
|                                              | No                            | Ref.                     | Ref.                     | Ref.                     | Ref.                       | Ref.                       |
| Job security                                 | Yes                           | 0.254 (0.022,0.485)*     | 0.26<br>(0.028,0.492)*   | 0.182<br>(-0.052,0.416)  | -0.027<br>(-0.258,0.204)   | -0.072<br>(-0.305,0.16)    |

\*Relevant confidence intervals.

**Supplementary Table 5. Standardized adjusted linear regression coefficient estimates with 95% confidence interval for the epigenetic age and pace of aging.**

|                    |                    | HorvathAA<br>Estimates<br>(95% CI) | HannumAA<br>Estimates<br>(95% CI) | PhenoAgeAA<br>Estimates<br>(95% CI) | GrimAgeAA<br>Estimates (95%<br>CI) | DunedinPoAm<br>Estimates<br>(95% CI) |
|--------------------|--------------------|------------------------------------|-----------------------------------|-------------------------------------|------------------------------------|--------------------------------------|
| Job Status         | permanent          | Ref.                               | Ref.                              | Ref.                                | Ref.                               | Ref.                                 |
|                    | temporary          | -1.127<br>(-2.422,0.168)           | -0.694<br>(-1.661,0.272)          | -0.505<br>(-2.017,1.008)            | 0.631<br>(-0.341,1.602)            | 0.005<br>(-0.013,0.023)              |
| Employer           | unemployed         | 0.063<br>(-1.325,1.451)            | -0.006<br>(-1.042,1.03)           | 0.817<br>(-0.804,2.438)             | 0.602<br>(-0.439,1.644)            | 0.004<br>(-0.015,0.023)              |
|                    | private employer   | Ref.                               | Ref.                              | Ref.                                | Ref.                               | Ref.                                 |
|                    | state/municipality | 0.563<br>(-0.42,1.546)             | 0.297<br>(-0.441,1.034)           | 0.415<br>(-0.736,1.567)             | 0.25<br>(-0.454,0.953)             | 0.003<br>(-0.01,0.017)               |
| Occupational group | Blue collars       | Ref.                               | Ref.                              | Ref.                                | Ref.                               | Ref.                                 |
|                    | White collars      | -0.509<br>(-1.292,0.274)           | -0.318<br>(-0.905,0.268)          | -0.257<br>(-1.166,0.653)            | 0.683<br>(0.102,1.264)*            | 0.002<br>(-0.008,0.013)              |
| Job control        |                    | 0.317<br>(-0.149,0.782)            | 0.169<br>(-0.179,0.517)           | -0.186<br>(-0.73,0.359)             | -0.154<br>(-0.508,0.199)           | -0.001<br>(-0.007,0.006)             |
| Job demand         |                    | 0.086<br>(-0.446,0.618)            | 0.118<br>(-0.279,0.514)           | -0.483<br>(-1.103,0.137)            | -0.018<br>(-0.42,0.384)            | -0.004 (-<br>0.012,0.003)            |
| Job strain Linear  |                    | -0.41<br>(-1.234,0.415)            | -0.154<br>(-0.769,0.462)          | -0.354<br>(-1.314,0.605)            | 0.157<br>(-0.465,0.779)            | -0.005<br>(-0.017,0.006)             |
| Job strain         | Low strain         | Ref.                               | Ref.                              | Ref.                                | Ref.                               | Ref.                                 |

|                                |                               |                            |                            |                            |                          |                          |
|--------------------------------|-------------------------------|----------------------------|----------------------------|----------------------------|--------------------------|--------------------------|
|                                | active work                   | 0.217<br>(-0.724,1.158)    | 0.271<br>(-0.431,0.973)    | -1.301<br>(-2.391,-0.212)* | 0.254<br>(-0.454,0.963)  | -0.005<br>(-0.018,0.009) |
|                                | passive work                  | 0.177<br>(-0.856,1.21)     | 0.223<br>(-0.547,0.994)    | -0.666<br>(-1.862,0.53)    | 0.518<br>(-0.26,1.296)   | 0.005<br>(-0.01,0.019)   |
|                                | high strain                   | -0.189<br>(-1.256,0.877)   | -0.037<br>(-0.832,0.759)   | -0.527<br>(-1.761,0.708)   | 0.526<br>(-0.277,1.329)  | 0<br>(-0.015,0.015)      |
| Job strain quotient            |                               | -0.843<br>(-2.066,0.379)   | -0.414<br>(-1.328,0.499)   | -0.568<br>(-1.992,0.855)   | 0.234<br>(-0.69,1.157)   | -0.009<br>(-0.026,0.008) |
|                                | Low strain                    | Ref.                       | Ref.                       | Ref.                       | Ref.                     | Ref.                     |
| Job strain tertile             | Intermediate strain           | -0.328<br>(-1.194,0.538)   | -0.101<br>(-0.748,0.545)   | -0.942<br>(-1.946,0.062)   | 0.31<br>(-0.343,0.963)   | 0.001<br>(-0.012,0.013)  |
|                                | high strain                   | -0.226<br>(-1.109,0.657)   | -0.032<br>(-0.691,0.627)   | -0.283 (-<br>1.307,0.741)  | 0.133<br>(-0.532,0.799)  | -0.002<br>(-0.014,0.011) |
| Effort                         |                               | -0.582<br>(-1.098,-0.066)* | -0.44<br>(-0.825,-0.054)*  | -0.323<br>(-0.932,0.285)   | 0.013<br>(-0.381,0.408)  | 0.001<br>(-0.006,0.008)  |
| Reward                         |                               | 0.115<br>(-0.53,0.76)      | 0.212<br>(-0.27,0.693)     | 0.049<br>(-0.705,0.803)    | 0.095<br>(-0.391,0.58)   | -0.005<br>(-0.014,0.004) |
| Effort-Reward Imbalance        |                               | -0.734<br>(-1.598,0.13)    | -0.61<br>(-1.255,0.036)    | -0.38 (-<br>1.394,0.634)   | 0.021<br>(-0.632,0.673)  | 0.004<br>(-0.008,0.016)  |
| Overcommitment                 |                               | 0.097<br>(-0.448,0.641)    | 0.065<br>(-0.343,0.472)    | 0.24<br>(-0.396,0.876)     | -0.029<br>(-0.443,0.386) | 0<br>(-0.008,0.008)      |
|                                | At least temporary unemployed | Ref.                       | Ref.                       | Ref.                       | Ref.                     | Ref.                     |
| Work history                   | Continuously Employed         | 0.205<br>(-0.46,0.87)      | 0.232<br>(-0.263,0.728)    | -0.064<br>(-0.838,0.709)   | -0.406<br>(-0.905,0.092) | -0.005<br>(-0.014,0.005) |
| Occupational Physical Activity | Low Intensity                 | Ref.                       | Ref.                       | Ref.                       | Ref.                     | Ref.                     |
|                                | Intermediate Intensity        | -0.357<br>(-1.42,0.705)    | -0.176<br>(-0.971,0.618)   | 0.472<br>(-0.775,1.719)    | 0.638<br>(-0.169,1.445)  | 0.002<br>(-0.013,0.017)  |
| strenuousness                  | High Intensity                | -0.345<br>(-1.406,0.715)   | -0.087<br>(-0.88,0.705)    | 0.623<br>(-0.621,1.867)    | 0.017<br>(-0.787,0.822)  | -0.013<br>(-0.028,0.002) |
|                                | less than 31 hours            | Ref.                       | Ref.                       | Ref.                       | Ref.                     | Ref.                     |
| Working hours per week         | 31-40 hours                   | 1.511<br>(-0.001,3.022)*   | 1.171<br>(0.042,2.3)*      | -0.446<br>(-2.227,1.336)   | -0.629<br>(-1.783,0.526) | -0.006<br>(-0.028,0.015) |
|                                | more than 40 hours            | 2.009<br>(0.368,3.651)*    | 1.547<br>(0.321,2.772)*    | 0.197<br>(-1.737,2.132)    | -0.657<br>(-1.911,0.597) | -0.005<br>(-0.028,0.018) |
|                                | Day job                       | Ref.                       | Ref.                       | Ref.                       | Ref.                     | Ref.                     |
| Working shift                  | Evening/shift                 | 0.346<br>(-0.54,1.232)     | 0.342<br>(-0.322,1.005)    | 0.481<br>(-0.562,1.524)    | 0.176<br>(-0.5,0.852)    | 0.007<br>(-0.005,0.02)   |
| Work attitude                  |                               | 0.025<br>(-0.073,0.123)    | 0.01<br>(-0.063,0.083)     | -0.006 (-<br>0.12,0.109)   | 0.04<br>(-0.033,0.112)   | 0<br>(-0.002,0.001)      |
| Work engagement                |                               | 0.012<br>(-0.022,0.046)    | 0.008<br>(-0.018,0.034)    | 0.01<br>(-0.03,0.05)       | -0.01<br>(-0.036,0.016)  | 0<br>(-0.001,0)          |
|                                | No                            | Ref.                       | Ref.                       | Ref.                       | Ref.                     | Ref.                     |
| Job security                   | Yes                           | -1.115<br>(-2.071,-0.16)*  | -0.841<br>(-1.555,-0.127)* | -1.015<br>(-2.138,0.109)   | 0.01<br>(-0.72,0.74)     | 0.004<br>(-0.009,0.018)  |

Fully adjusted models for: BMI, alcohol consumption, educational level, leisure-time physical activity and smoking.

\*Relevant confidence intervals.

**Supplementary Table 6. Women adjusted linear regression coefficient estimates with 95% confidence interval for the epigenetic age and pace of aging.**

|                                |                               | <b>HorvathAA</b>              | <b>HannumAA</b>               | <b>PhenoAgeAA</b>             | <b>GrimAgeAA</b>              | <b>DunedinPoAm</b>            |
|--------------------------------|-------------------------------|-------------------------------|-------------------------------|-------------------------------|-------------------------------|-------------------------------|
|                                |                               | <b>Estimates<br/>(95% CI)</b> | <b>Estimates<br/>(95% CI)</b> | <b>Estimates<br/>(95% CI)</b> | <b>Estimates<br/>(95% CI)</b> | <b>Estimates<br/>(95% CI)</b> |
| Job Status                     | permanent                     | Ref.                          | Ref.                          | Ref.                          | Ref.                          | Ref.                          |
|                                | temporary                     | -1.484                        | -0.998                        | -0.889                        | 0.762                         | 0.002                         |
|                                | unemployed                    | (-2.922,-0.047) *             | (-2.079,0.082)                | (-2.592,0.813)                | (-0.298,1.822)                | (-0.018,0.023)                |
| Employer                       | private employer              | 0.012                         | -0.128                        | 1.125                         | 1.463                         | 0.009                         |
|                                | state/municipality            | (-2.01,2.034)                 | (-1.648,1.392)                | (-1.27,3.52)                  | (-0.028,2.955)                | (-0.019,0.038)                |
| Occupational group             | Blue collars                  | Ref.                          | Ref.                          | Ref.                          | Ref.                          | Ref.                          |
|                                | White collars                 | 0.557                         | 0.447                         | 0.577                         | -0.306                        | 0.007                         |
| Job control                    |                               | (-0.482,1.596)                | (-0.332,1.225)                | (-0.622,1.776)                | (-1.063,0.451)                | (-0.007,0.022)                |
|                                |                               | 0.413                         | 0.297                         | -0.079                        | -0.285                        | 0.005                         |
| Job demand                     |                               | (-0.219,1.045)                | (-0.177,0.77)                 | (-0.818,0.659)                | (-0.749,0.178)                | (-0.004,0.014)                |
|                                |                               | 0.203                         | 0.262                         | -0.377                        | 0.271                         | 0.002                         |
| Job strain Linear              |                               | (-0.549,0.954)                | (-0.299,0.824)                | (-1.251,0.498)                | (-0.279,0.82)                 | (-0.008,0.013)                |
|                                |                               | -0.398                        | -0.185 (-                     | -0.435                        | 0.603                         | -0.006                        |
| Job strain                     |                               | (-1.485,0.689)                | 0.999,0.629)                  | (-1.694,0.824)                | (-0.184,1.389)                | (-0.022,0.009)                |
|                                | Low strain                    | Ref.                          | Ref.                          | Ref.                          | Ref.                          | Ref.                          |
|                                | active work                   | 0.411                         | 0.393                         | -1.414                        | 0.501                         | 0.004                         |
| Job strain                     |                               | (-0.964,1.786)                | (-0.634,1.421)                | (-3.006,0.179)                | (-0.499,1.5)                  | (-0.015,0.023)                |
|                                | passive work                  | 0.38                          | 0.298                         | -0.915                        | 0.316                         | -0.003                        |
| Job strain quotient            |                               | (-1.156,1.917)                | (-0.85,1.446)                 | (-2.694,0.864)                | (-0.801,1.433)                | (-0.025,0.019)                |
|                                | high strain                   | -0.611                        | -0.502                        | -1.188                        | 0.754                         | -0.003                        |
| Job strain tertile             |                               | (-2.006,0.784)                | (-1.544,0.54)                 | (-2.803,0.427)                | (-0.26,1.768)                 | (-0.022,0.017)                |
|                                | Low strain                    | -1.009                        | -0.525                        | -0.727                        | 0.728                         | -0.014                        |
| Job strain tertile             |                               | (-2.579,0.561)                | (-1.701,0.652)                | (-2.549,1.094)                | (-0.412,1.867)                | (-0.036,0.008)                |
|                                | Intermediate strain           | Ref.                          | Ref.                          | Ref.                          | Ref.                          | Ref.                          |
|                                | high strain                   | 0.055                         | 0.198                         | -0.958                        | 0.216                         | -0.009                        |
| Effort                         |                               | (-1.198,1.309)                | (-0.74,1.136)                 | (-2.407,0.491)                | (-0.692,1.124)                | (-0.026,0.009)                |
|                                |                               | -0.21                         | -0.148                        | -0.567                        | 0.541                         | -0.007                        |
| Reward                         |                               | (-1.397,0.977)                | (-1.036,0.74)                 | (-1.939,0.805)                | (-0.319,1.401)                | (-0.023,0.01)                 |
|                                |                               | -0.985                        | -0.679                        | -0.737                        | -0.362                        | -0.006                        |
| Effort-Reward Imbalance        |                               | (-1.67,-0.3) *                | (-1.193,-0.165) *             | (-1.547,0.072)                | (-0.874,0.149)                | (-0.016,0.004)                |
|                                |                               | -0.007                        | 0.06                          | -0.223                        | 0.596                         | -0.003                        |
| Overcommitment                 |                               | (-0.881,0.866)                | (-0.596,0.715)                | (-1.243,0.796)                | (-0.03,1.223)                 | (-0.015,0.01)                 |
|                                |                               | -1.292                        | -0.915                        | -0.669                        | -0.769                        | -0.007                        |
| Work history                   |                               | (-2.486,-0.099) *             | (-1.812,-0.019) *             | (-2.075,0.737)                | (-1.635,0.096)                | (-0.024,0.009)                |
|                                | At least temporary unemployed | -0.482                        | -0.339                        | -0.193                        | -0.331                        | -0.006                        |
|                                | Continuously Employed         | (-1.189,0.224)                | (-0.868,0.191)                | (-1.019,0.632)                | (-0.853,0.192)                | (-0.016,0.005)                |
| Occupational Physical Activity |                               | Ref.                          | Ref.                          | Ref.                          | Ref.                          | Ref.                          |
|                                | Low Intensity                 | 0.201                         | 0.38                          | 0.169                         | -0.659 (-                     | -0.004                        |
|                                | Intermediate Intensity        | (-0.685,1.087)                | (-0.283,1.043)                | (-0.87,1.208)                 | 1.309,-0.009) *               | (-0.016,0.009)                |
| Occupational Physical Activity |                               | Ref.                          | Ref.                          | Ref.                          | Ref.                          | Ref.                          |
|                                | High Intensity                | -0.361                        | -0.153                        | 0.481                         | -0.12                         | -0.006                        |
| Occupational Physical Activity |                               | (-1.82,1.098)                 | (-1.243,0.937)                | (-1.227,2.189)                | (-1.202,0.963)                | (-0.027,0.015)                |
|                                |                               | 1.3                           | 1.248                         | 1.519                         | 0.127                         | -0.01                         |
|                                |                               | (-0.253,2.853)                | (0.088,2.408) *               | (-0.299,3.337)                | (-1.025,1.279)                | (-0.033,0.012)                |

|                        |                    |                          |                          |                          |                          |                          |
|------------------------|--------------------|--------------------------|--------------------------|--------------------------|--------------------------|--------------------------|
|                        | less than 31 hours | Ref.                     | Ref.                     | Ref.                     | Ref.                     | Ref.                     |
| Working hours per week | 31-40 hours        | 1.509<br>(-0.245,3.262)  | 1.345<br>(0.034,2.655) * | -0.558<br>(-2.613,1.497) | -0.681<br>(-1.984,0.623) | -0.013<br>(-0.038,0.011) |
|                        | more than 40 hours | 2.483<br>(0.421,4.546) * | 2.075<br>(0.534,3.616) * | 1.17<br>(-1.246,3.587)   | -0.393<br>(-1.926,1.141) | 0.003<br>(-0.027,0.032)  |
|                        | Day job            | Ref.                     | Ref.                     | Ref.                     | Ref.                     | Ref.                     |
| Working shift          | Evening/shift      | 0.385<br>(-0.819,1.588)  | 0.243<br>(-0.662,1.148)  | 0.494<br>(-0.92,1.909)   | -0.077<br>(-0.972,0.817) | -0.005<br>(-0.022,0.012) |
|                        | Work attitude      | 0.045<br>(-0.083,0.174)  | 0.033<br>(-0.064,0.129)  | 0.076<br>(-0.075,0.228)  | 0.002<br>(-0.091,0.095)  | 0<br>(-0.002,0.002)      |
| Work engagement        |                    | 0.01<br>(-0.037,0.056)   | 0.01<br>(-0.025,0.044)   | 0.04<br>(-0.015,0.094)   | -0.008<br>(-0.043,0.027) | 0<br>(-0.001,0.001)      |
| Job security           | No                 | Ref.                     | Ref.                     | Ref.                     | Ref.                     | Ref.                     |
|                        | Yes                | 1.06<br>(-0.274,2.393)   | 0.617<br>(-0.384,1.617)  | 0.535<br>(-1.031,2.1)    | -0.668<br>(-1.653,0.317) | -0.012<br>(-0.031,0.007) |

Fully adjusted models for: BMI, alcohol consumption, educational level, leisure-time physical activity and smoking.

\*Relevant confidence intervals.

**Supplementary Table 7. Men adjusted linear regression coefficient estimates with 95% confidence interval for the epigenetic age and pace of aging.**

|                     |                     | HorvathAA                | HannumAA                 | PhenoAgeAA               | GrimAgeAA                   | DunedinPoAm                 |
|---------------------|---------------------|--------------------------|--------------------------|--------------------------|-----------------------------|-----------------------------|
|                     |                     | Estimates (95% CI)       | Estimates (95% CI)       | Estimates (95% CI)       | Estimates (95% CI)          | Estimates (95% CI)          |
| Job Status          | permanent           | Ref.                     | Ref.                     | Ref.                     | Ref.                        | Ref.                        |
|                     | temporary           | 0.119<br>(-2.855,3.093)  | 0.354<br>(-1.849,2.558)  | 0.786<br>(-2.598,4.169)  | 0.031<br>(-2.222,2.285)     | 0.019<br>(-0.022,0.059)     |
|                     | unemployed          | -0.225<br>(-2.213,1.763) | -0.11<br>(-1.584,1.363)  | 0.276<br>(-1.986,2.538)  | -0.264<br>(-1.771,1.243)    | -0.003<br>(-0.03,0.024)     |
| Employer            | private employer    | Ref.                     | Ref.                     | Ref.                     | Ref.                        | Ref.                        |
|                     | state/municipality  | -0.581<br>(-1.878,0.716) | -0.246<br>(-1.217,0.724) | -0.232<br>(-1.732,1.269) | -0.451<br>(-1.43,0.528)     | -0.005<br>(-0.023,0.013)    |
| Occupational group  | Blue collars        | Ref.                     | Ref.                     | Ref.                     | Ref.                        | Ref.                        |
|                     | White collars       | 0.433<br>(-0.784,1.65)   | 0.118<br>(-0.794,1.03)   | -0.283<br>(-1.705,1.139) | -1.245<br>(-2.164,-0.325) * | -0.015<br>(-0.032,0.001)    |
| Job control         |                     | 0.175<br>(-0.535,0.885)  | 0.001<br>(-0.529,0.531)  | -0.316<br>(-1.14,0.508)  | -0.029<br>(-0.586,0.527)    | -0.007<br>(-0.017,0.003)    |
| Job demand          |                     | -0.149<br>(-0.932,0.633) | -0.106<br>(-0.69,0.478)  | -0.716<br>(-1.619,0.187) | -0.347<br>(-0.957,0.264)    | -0.012<br>(-0.023,-0.001) * |
| Job strain Linear   |                     | -0.511<br>(-1.815,0.794) | -0.168<br>(-1.142,0.807) | -0.335<br>(-1.845,1.175) | -0.447<br>(-1.468,0.574)    | -0.006<br>(-0.025,0.012)    |
| Job strain          | Low strain          | Ref.                     | Ref.                     | Ref.                     | Ref.                        | Ref.                        |
|                     | active work         | -0.211<br>(-1.546,1.125) | -0.035<br>(-1.028,0.958) | -1.458<br>(-2.993,0.078) | -0.233<br>(-1.276,0.811)    | -0.016<br>(-0.035,0.002)    |
|                     | passive work        | -0.095<br>(-1.526,1.336) | 0.102<br>(-0.962,1.167)  | -0.458<br>(-2.103,1.188) | 0.625<br>(-0.493,1.744)     | 0.012<br>(-0.008,0.032)     |
| Job strain quotient | high strain         | 0.965<br>(-0.873,2.803)  | 1.104<br>(-0.263,2.47)   | 0.212<br>(-1.9,2.325)    | 0.105<br>(-1.331,1.541)     | 0.004 (-0.021,0.03)         |
|                     |                     | -0.749<br>(-2.776,1.278) | -0.365<br>(-1.878,1.148) | -0.585<br>(-2.93,1.761)  | -0.454<br>(-2.041,1.133)    | -0.005<br>(-0.034,0.023)    |
| Job strain tertile  | Low strain          | Ref.                     | Ref.                     | Ref.                     | Ref.                        | Ref.                        |
|                     | Intermediate strain | -0.813<br>(-2.053,0.427) | -0.476<br>(-1.401,0.448) | -0.866<br>(-2.3,0.569)   | 0.367<br>(-0.601,1.335)     | 0.009<br>(-0.008,0.027)     |
|                     | high strain         | -0.137<br>(-1.517,1.243) | 0.25<br>(-0.779,1.279)   | -0.011<br>(-1.608,1.585) | -0.586<br>(-1.664,0.491)    | 0<br>(-0.02,0.02)           |
| Effort              |                     | -0.113<br>(-0.916,0.689) | -0.169<br>(-0.768,0.43)  | 0.253<br>(-0.682,1.188)  | 0.424<br>(-0.203,1.05)      | 0.011<br>(-0.001,0.022)     |

|                                   |                                  |                             |                            |                          |                          |                          |
|-----------------------------------|----------------------------------|-----------------------------|----------------------------|--------------------------|--------------------------|--------------------------|
| Reward                            |                                  | 0.389<br>(-0.586,1.364)     | 0.462<br>(-0.264,1.187)    | 0.323<br>(-0.805,1.451)  | -0.488<br>(-1.256,0.28)  | -0.007<br>(-0.021,0.007) |
| Effort-Reward<br>Imbalance        |                                  | -0.283<br>(-1.565,0.998)    | -0.377<br>(-1.331,0.578)   | 0.016<br>(-1.466,1.499)  | 0.765<br>(-0.242,1.771)  | 0.018<br>(-0.001,0.036)  |
| Overcommitment                    |                                  | 0.85<br>(-0.032,1.731)      | 0.575<br>(-0.086,1.237)    | 0.721<br>(-0.306,1.749)  | 0.3<br>(-0.394,0.994)    | 0.008<br>(-0.005,0.02)   |
| Work history                      | At least temporary<br>unemployed | Ref.                        | Ref.                       | Ref.                     | Ref.                     | Ref.                     |
|                                   | Continuously<br>Employed         | 0.258<br>(-0.803,1.319)     | 0.08<br>(-0.707,0.866)     | -0.47<br>(-1.677,0.737)  | -0.005<br>(-0.81,0.799)  | -0.006<br>(-0.02,0.009)  |
|                                   | Low Intensity                    | Ref.                        | Ref.                       | Ref.                     | Ref.                     | Ref.                     |
| Occupational<br>Physical Activity | Intermediate<br>Intensity        | -0.258<br>(-1.859,1.343)    | -0.132<br>(-1.33,1.066)    | 0.764<br>(-1.122,2.65)   | 1.651<br>(0.4,2.901) *   | 0.013 (-0.01,0.036)      |
|                                   | High Intensity                   | -1.775<br>(-3.283,-0.267) * | -1.22<br>(-2.348,-0.092) * | 0.089<br>(-1.688,1.865)  | 0.378<br>(-0.8,1.556)    | -0.012<br>(-0.034,0.009) |
|                                   | less than 31 hours               | Ref.                        | Ref.                       | Ref.                     | Ref.                     | Ref.                     |
| Working hours per<br>week         | 31-40 hours                      | 1.854<br>(-1.247,4.955)     | 0.903<br>(-1.416,3.223)    | -0.512<br>(-4.139,3.115) | -0.497<br>(-2.931,1.938) | 0.015<br>(-0.029,0.058)  |
|                                   | more than 40 hours               | 2.095<br>(-1.089,5.278)     | 1.072<br>(-1.309,3.454)    | -0.609<br>(-4.332,3.115) | -0.884<br>(-3.383,1.616) | 0.005<br>(-0.04,0.05)    |
|                                   | Day job                          | Ref.                        | Ref.                       | Ref.                     | Ref.                     | Ref.                     |
| Working shift                     | Evening/shift                    | 0.129<br>(-1.211,1.468)     | 0.339<br>(-0.661,1.339)    | 0.229<br>(-1.333,1.792)  | 0.446<br>(-0.598,1.491)  | 0.021<br>(0.002,0.039) * |
|                                   |                                  | -0.014<br>(-0.172,0.144)    | -0.033<br>(-0.15,0.084)    | -0.144<br>(-0.323,0.034) | 0.073<br>(-0.046,0.192)  | -0.001<br>(-0.003,0.001) |
| Work attitude                     |                                  | 0.012<br>(-0.04,0.064)      | 0.005<br>(-0.034,0.043)    | -0.021<br>(-0.081,0.04)  | -0.015<br>(-0.056,0.025) | -0.001<br>(-0.001,0)     |
| Work engagement                   |                                  | Ref.                        | Ref.                       | Ref.                     | Ref.                     | Ref.                     |
| Job security                      | No                               | 1.293<br>(-0.13,2.716)      | 1.132<br>(0.072,2.191) *   | 1.407<br>(-0.253,3.067)  | 0.69<br>(-0.429,1.809)   | 0.005<br>(-0.015,0.026)  |
|                                   | Yes                              |                             |                            |                          |                          |                          |

Fully adjusted models for: BMI, alcohol consumption, educational level, leisure-time physical activity and smoking.

\*Relevant confidence intervals.
